# Supplementary material for: In situ pyrazolylborate ligand synthesis and coordination behaviours in aluminum oxo clusters
Source: Royal Society of Chemistry journal article supplement (doi:10.1039/d3qi00057e), 2023-01-01
Supplement: d3qi00057e1.pdf [file d3qi00057e1.pdf]

## Supporting Information

### In situ pyrazolyborate ligand synthesis and coordination behaviours in aluminum oxo clusters

Jian-Bing Chen,<sup>[a,b]</sup> San-Tai Wang,<sup>[a,c]</sup> Si-Hao Shen,<sup>[a,c]</sup> Ying-Hua Yu,<sup>[a,c]</sup> Wei-Hui Fang,<sup>\*[a]</sup> and Jian Zhang<sup>\*[a]</sup>

<sup>a</sup> State Key Laboratory of Structural Chemistry, Fujian Institute of Research on the Structure of Matter, the Chinese Academy of Sciences, Fuzhou, Fujian 350002, People's Republic of China.

<sup>b</sup> School of Physical Science and Technology, ShanghaiTech University, Shanghai 201210 (P. R. China)

<sup>c</sup> University of Chinese Academy of Sciences Chinese Academy of Sciences Beijing 100049, P. R. China.

E-mail: fwh@fjirsm.ac.cn; zhj@fjirsm.ac.cn

## Contents

|                                                            |     |
|------------------------------------------------------------|-----|
| Experimental Section.....                                  | S2  |
| PXRD analyses for Al-O-B clusters. ....                    | S7  |
| FT-IR spectra of Al-O-B clusters. ....                     | S9  |
| EDS spectra of Al-O-B clusters.....                        | S11 |
| The solid-state absorption spectra of Al-O-B clusters..... | S12 |
| TGA spectra of Al-O-B clusters.....                        | S13 |
| Calculation of the nonlinear optical parameters.....       | S14 |
| References.....                                            | S15 |

## Experimental Section

All the reagents and solvents were commercially and used as received without further purification. Aluminium isopropoxide, pyrazole and 4-methylpyrazole were acquired from Aladdin Chemical Reagent Shanghai. Phenylboronic acid, 3,5-bis(Trifluoromethyl)benzeneboronic, 3-chlorophenylboronic acid, 3-fluorophenylboronic acid, 4-fluorophenylboronic acid, ethanol ( $\geq 99.5\%$ ) and acetonitrile ( $\geq 99.5\%$ ) were acquired from Sinopharm Chemical Reagent Beijing.

### Synthesis of AIOC-126 $[\text{Al}_2(\text{L}^1)_2(\text{HL}^1)_2 \cdot \text{MeCN}] (\text{L}^1 = \text{PhB}(\mu\text{-O})(\text{pz})_2)$

A mixture of aluminium isopropoxide (204 mg, 1 mmol), phenylboronic acid (121 mg, 1 mmol), pyrazole (2 g, 29.38 mmol) and acetonitrile (2 mL) was sealed in a 20 mL vial and transferred to a preheated oven at 100 °C for 5 days. When cooled to room temperature, block colourless crystals were obtained. (yield: 42% based on  $\text{Al}(\text{O}^i\text{Pr})_3$ ). The crystals are rinsed with ethanol and preserved under a sealed and dry environment. FT-IR (KBr,  $\text{cm}^{-1}$ ): 1575(v), 1400(s), 1200(s), 1026(s), 769(s), 669(s), 495(s).

The synthesis of **AIOC-126-1**  $[\text{Al}_2(\text{L}^{1'})_2(\text{HL}^{1'})_2 \cdot \text{MeCN}] (\text{L}^{1'} = (3\text{-F-PhB}(\mu\text{-O})(\text{pz})_2)$ , **AIOC-126-2**  $[\text{Al}_2(\text{L}^{1''})_2(\text{HL}^{1''})_2] (\text{L}^{1''} = (4\text{-F-PhB}(\mu\text{-O})(\text{pz})_2)$ , **AIOC-126-3**  $[\text{Al}_2(\text{L}^{1'''} )_2(\text{HL}^{1'''} )_2] (\text{L}^{1'''} = (3\text{-Cl-PhB}(\mu\text{-O})(\text{pz})_2)$  was replaced by different functionalized phenylboronic acids under the same synthesized conditions of **AIOC-126**.

### Synthesis of AIOC-127 $[\text{Al}_4(\text{L}^2)_4(\mu_3\text{-O})(\text{pz-CH}_3)_3] \cdot \text{MeCN} (\text{L}^2 = (3,5\text{-Bis-CF}_3\text{-PhB}(\mu\text{-O})(\text{pz-CH}_3)_2)$

A mixture of aluminium isopropoxide (204 mg, 1 mmol), 3,5-bis(Trifluoromethyl) benzeneboronic acid, (257 mg, 1 mmol), 4-methylpyrazole (2 g, 24.36 mmol) and acetonitrile (2 mL) was sealed in a 20 mL vial and transferred to a preheated oven at 100 °C for 5 days. When cooled to room temperature, block colourless crystals were obtained. (yield: 21% based on  $\text{Al}(\text{O}^i\text{Pr})_3$ ). The crystals are rinsed with ethanol and preserved under a sealed and dry environment. FT-IR (KBr,  $\text{cm}^{-1}$ ): 3320(m), 2927(v), 2362(m), 1392(m), 1274(s), 1107(s), 850(s), 680(s).

### Synthesis of AIOC-128 $[\text{Al}_6(\text{L}^3)_6(\mu_3\text{-O})_2(\text{pz-CH}_3)_2] (\text{L}^3 = (3\text{-F-PhB}(\mu\text{-O})(\text{pz-CH}_3)_2)$

A mixture of aluminium isopropoxide (204 mg, 1 mmol), 3-fluorophenylboronic acid (139 mg, 1 mmol), 4-methylpyrazole (2 g, 24.36 mmol) and acetonitrile (2 mL) was sealed in a 20 mL vial and transferred to a preheated oven at 100 °C for 5 days. When cooled to room temperature, block colourless crystals were obtained. (yield: 38% based on  $\text{Al}(\text{O}^i\text{Pr})_3$ ). The crystals are rinsed with ethanol and preserved under a sealed and dry environment. FT-IR (KBr,  $\text{cm}^{-1}$ ): 2923(s), 2360(m), 1571(v), 1394(m), 1420(s), 1234(s), 1107(s), 774(s).

## Z-scan measurements

The Z-scan technique<sup>1</sup> was applied to investigate the nonlinear optical (NLO) behavior of the samples with an output wavelength of 532 nm. A picosecond light source irradiated by a PL2250 laser (EKSPILA) was a Q-switched Nd: YAG pulsed laser system having a pulse width of 30 ps, a repetition frequency of 10 Hz, a beam waist radius of  $\omega_0$  of 23  $\mu\text{m}$ , and a Rayleigh length of 3.12 mm. Liquid samples were measured in 2 mm quartz cuvettes for testing. The cuvettes were mounted on a computer-controlled translation stage that shifted the samples along the z axis and all test procedures were conducted at room temperature. For comparison, the linear transmittance of the sample was adjusted to be  $\sim 65\%$ .

## X-Ray crystallographic analysis

Crystallographic data of crystal **AIOC-126**, **AIOC-126-1**, **AIOC-126-2**, **AIOC-126-3**, **AIOC-127** and **AIOC-128** were collected on Hybrid Pixel Array detector equipped with Ga-K $\alpha$  radiation ( $\lambda = 1.3405 \text{ \AA}$ ) at about 293 K. The structures were solved with the dual-direct methods using ShelXT and refined with the full-matrix least-squares technique based on  $F^2$  with the SHELXL. Non-hydrogen atoms were refined anisotropically, while hydrogen atoms were added theoretically, riding on the concerned atoms and refined with fixed thermal factors. All absorption corrections were performed using the multi-scan program. The obtained crystallographic data are summarized in Table S1.

Table S1. Crystal data and structure refinement results (**AIOC-126**, **AIOC-126-1**, **AIOC-126-2**, **AIOC-126-3**, **AIOC-127**, **AIOC-128**)

| Compound                    | AIOC-126                                                                 | AIOC-127                                                                              | AIOC-128                                                                           |
|-----------------------------|--------------------------------------------------------------------------|---------------------------------------------------------------------------------------|------------------------------------------------------------------------------------|
| Formula                     | $\text{C}_{50}\text{H}_{49}\text{Al}_2\text{B}_4\text{N}_{17}\text{O}_4$ | $\text{C}_{78}\text{H}_{61}\text{Al}_4\text{B}_4\text{F}_{24}\text{N}_{23}\text{O}_5$ | $\text{C}_{92}\text{H}_{94}\text{Al}_6\text{B}_6\text{F}_6\text{N}_{28}\text{O}_8$ |
| <i>Mr</i>                   | 1065.49                                                                  | 2055.71                                                                               | 2128.69                                                                            |
| Temperature(K)              | 293 (2)                                                                  | 293 (2)                                                                               | 293 (2)                                                                            |
| Wavelength ( $\text{\AA}$ ) | 1.34050                                                                  | 1.34050                                                                               | 1.34050                                                                            |
| Crystal system              | triclinic                                                                | triclinic                                                                             | monoclinic                                                                         |
| Space group                 | <i>P</i> -1                                                              | <i>P</i> -1                                                                           | <i>C</i> 2/ <i>c</i>                                                               |
| <i>a</i> / $\text{\AA}$     | 11.9881(2)                                                               | 14.79590(10)                                                                          | 18.8931(3)                                                                         |
| <i>b</i> / $\text{\AA}$     | 12.4767(2)                                                               | 15.0054(2)                                                                            | 20.5399(3)                                                                         |
| <i>c</i> / $\text{\AA}$     | 21.5093(3)                                                               | 22.6105(3)                                                                            | 27.5824(5)                                                                         |
| $\alpha$ / $^\circ$         | 100.2750(10)                                                             | 81.1480(10)                                                                           | 90                                                                                 |
| $\beta$ / $^\circ$          | 97.0680(10)                                                              | 82.3220(10)                                                                           | 91.246(2)                                                                          |
| $\gamma$ / $^\circ$         | 117.664(2)                                                               | 68.3070(10)                                                                           | 90                                                                                 |
| <i>V</i> / $\text{\AA}^3$   | 2724.37(9)                                                               | 4592.75(10)                                                                           | 10701.2(3)                                                                         |

|                                    |               |               |               |
|------------------------------------|---------------|---------------|---------------|
| Z                                  | 2             | 2             | 8             |
| $\rho/\text{g cm}^{-3}$            | 1.299         | 1.536         | 1.321         |
| $\mu/\text{mm}^{-1}$               | 0.632         | 2.000         | 0.800         |
| $F(000)$                           | 1112.0        | 2064.0        | 4416.0        |
| Collected reflns                   | 39228         | 97698         | 39249         |
| Unique reflns ( $R_{\text{int}}$ ) | 12289(0.0327) | 20483(0.0407) | 11920(0.0504) |
| Completeness                       | 1             | 1             | 1             |
| GOF on $F^2$                       | 1.093         | 1.033         | 1.082         |
| $R_1^a/wR_2^b[I > 2(I)]$           | 0.0430/0.1171 | 0.0807/0.2417 | 0.0596/0.1563 |
| CCDC number                        | 2234657       | 2234659       | 2234656       |

$$^a R_1 = \Sigma ||F_o| - |F_c|| / \Sigma |F_o| \quad ^b wR_2 = \{\Sigma [w(F_o^2 - F_c^2)^2] / \Sigma [w(F_o^2)^2]\}^{1/2}$$

| Compound                           | AIOC-126-1                                                                         | AIOC-126-2                                                                         | AIOC-126-3                                                                          |
|------------------------------------|------------------------------------------------------------------------------------|------------------------------------------------------------------------------------|-------------------------------------------------------------------------------------|
| Formula                            | $\text{C}_{50}\text{H}_{45}\text{Al}_2\text{B}_4\text{F}_4\text{N}_{17}\text{O}_4$ | $\text{C}_{48}\text{H}_{42}\text{Al}_2\text{B}_4\text{F}_4\text{N}_{16}\text{O}_4$ | $\text{C}_{48}\text{H}_{42}\text{Al}_2\text{B}_4\text{Cl}_4\text{N}_{16}\text{O}_4$ |
| Mr                                 | 1119.21                                                                            | 1080.17                                                                            | 1144.97                                                                             |
| Temperature(K)                     | 293(2)                                                                             | 293(2)                                                                             | 293(2)                                                                              |
| Wavelength (Å)                     | 1.34050                                                                            | 1.34050                                                                            | 1.34050                                                                             |
| Crystal system                     | triclinic                                                                          | monoclinic                                                                         | triclinic                                                                           |
| Space group                        | $P-1$                                                                              | $P2_1/c$                                                                           | $P-1$                                                                               |
| $a/\text{Å}$                       | 12.1335(3)                                                                         | 16.8343(4)                                                                         | 11.7060(2)                                                                          |
| $b/\text{Å}$                       | 12.5287(3)                                                                         | 14.6616(3)                                                                         | 19.7341(3)                                                                          |
| $c/\text{Å}$                       | 21.5352(4)                                                                         | 21.2160(4)                                                                         | 24.0968(3)                                                                          |
| $\alpha/^\circ$                    | 97.791(2)                                                                          | 90                                                                                 | 107.4400(10)                                                                        |
| $\beta/^\circ$                     | 99.012(2)                                                                          | 92.643(2)                                                                          | 90.4670(10)                                                                         |
| $\gamma/^\circ$                    | 118.010(3)                                                                         | 90                                                                                 | 90.8220(10)                                                                         |
| $V/\text{Å}^3$                     | 2771.26(13)                                                                        | 5230.92(19)                                                                        | 5309.65(14)                                                                         |
| Z                                  | 2                                                                                  | 4                                                                                  | 4                                                                                   |
| $\rho/\text{g cm}^{-3}$            | 1.341                                                                              | 1.372                                                                              | 1.432                                                                               |
| $\mu/\text{mm}^{-1}$               | 0.707                                                                              | 0.732                                                                              | 1.854                                                                               |
| $F(000)$                           | 1152.0                                                                             | 2224.0                                                                             | 2348.0                                                                              |
| Collected reflns                   | 26284                                                                              | 37476                                                                              | 66642                                                                               |
| Unique reflns ( $R_{\text{int}}$ ) | 9974(0.0201)                                                                       | 11474(0.0565)                                                                      | 23305(0.0699)                                                                       |
| Completeness                       | 0.99                                                                               | 0.98                                                                               | 0.99                                                                                |
| GOF on $F^2$                       | 1.062                                                                              | 1.068                                                                              | 1.061                                                                               |
| $R_1^a/wR_2^b[I > 2(I)]$           | 0.0424/0.1215                                                                      | 0.0692/0.1822                                                                      | 0.0879/0.2498                                                                       |
| CCDC number                        | 2234654                                                                            | 2234655                                                                            | 2234658                                                                             |

$$^a R_1 = \Sigma ||F_o| - |F_c|| / \Sigma |F_o| \quad ^b wR_2 = \{\Sigma [w(F_o^2 - F_c^2)^2] / \Sigma [w(F_o^2)^2]\}^{1/2}$$

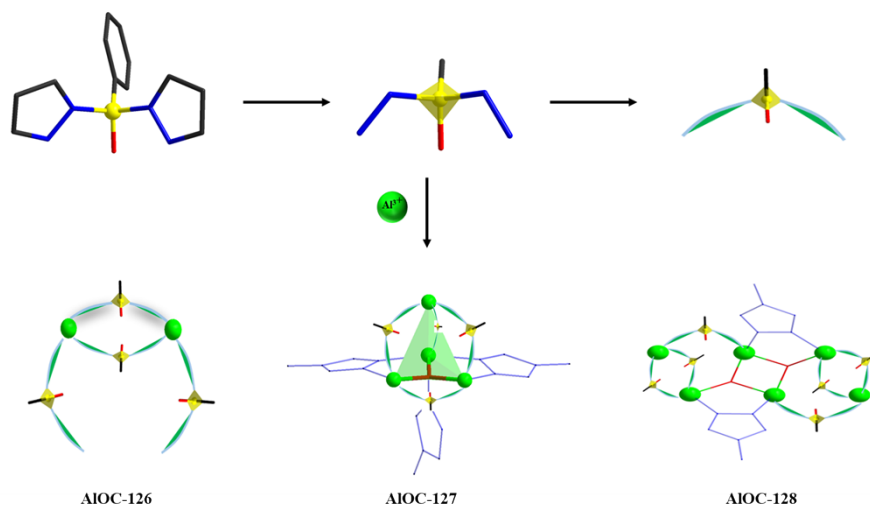

**Fig. S1** Schematic diagram of the combination of L and  $\text{Al}^{3+}$  in the **AIOC-126**, **AIOC-127**, **AIOC-128**.

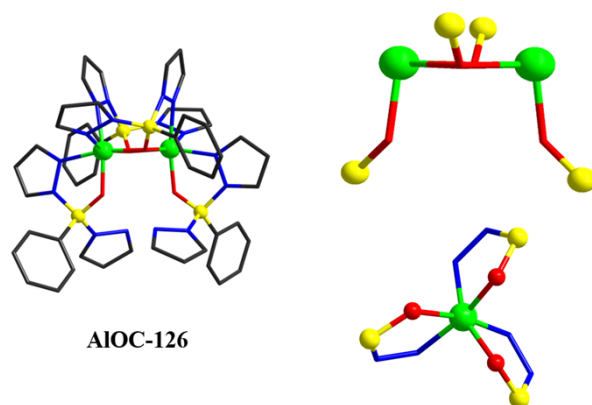

**Fig. S2** Coordination environment of  $\text{Al}^{3+}$  ions and B-O-Al unit in **AIOC-126**. Color code: Al, green; C, black; O, red; N, blue; B, yellow.

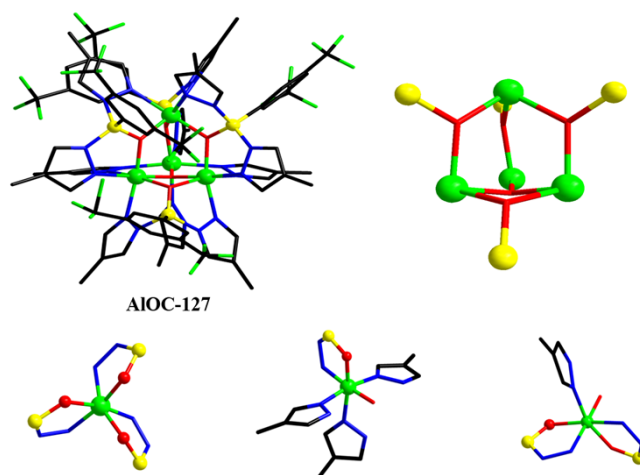

**Fig. S3** Coordination environment of  $\text{Al}^{3+}$  ions and B-O-Al unit in **AIOC-127**. Color code: Al, green; C, black; O, red; N, blue; B, yellow; F, green.

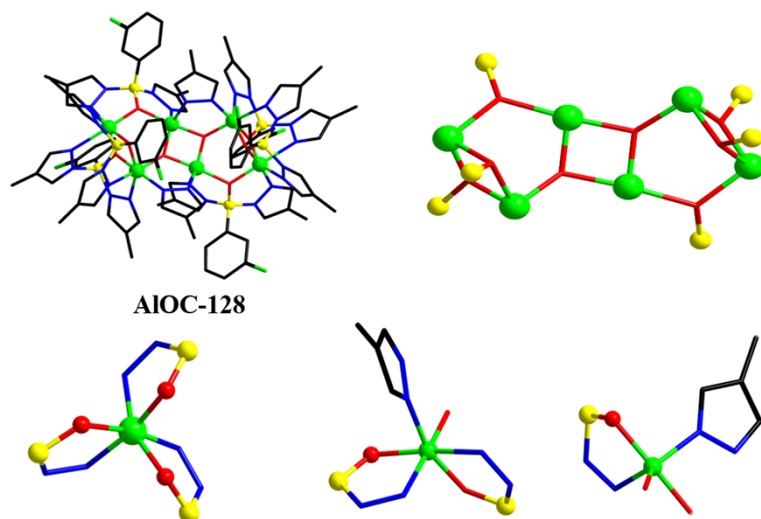

**Fig. S4** Coordination environment of  $\text{Al}^{3+}$  ions and B-O-Al unit in **AIOC-128**. Color code: Al, green; C, black; O, red; N, blue; B, yellow; F, green.

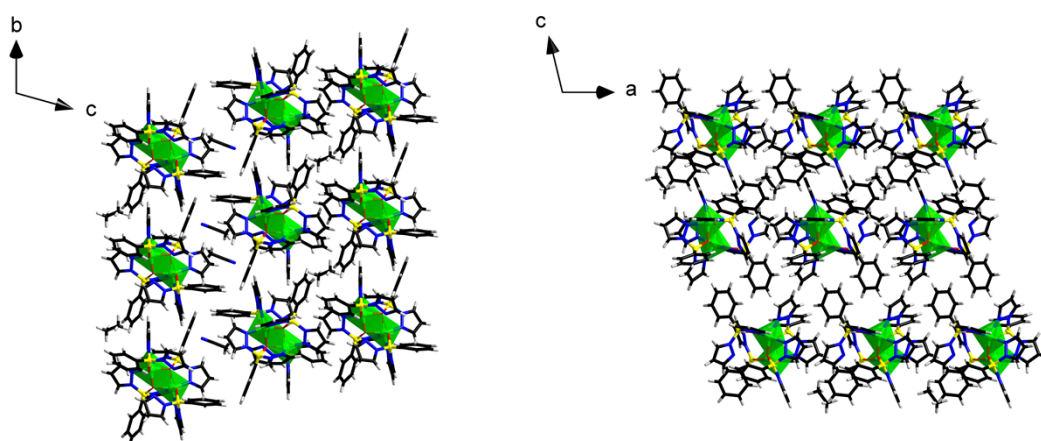

**Figure S5.** Packing diagrams of **AIOC-126** in the view of (a) a-axis and (b) c-axis.

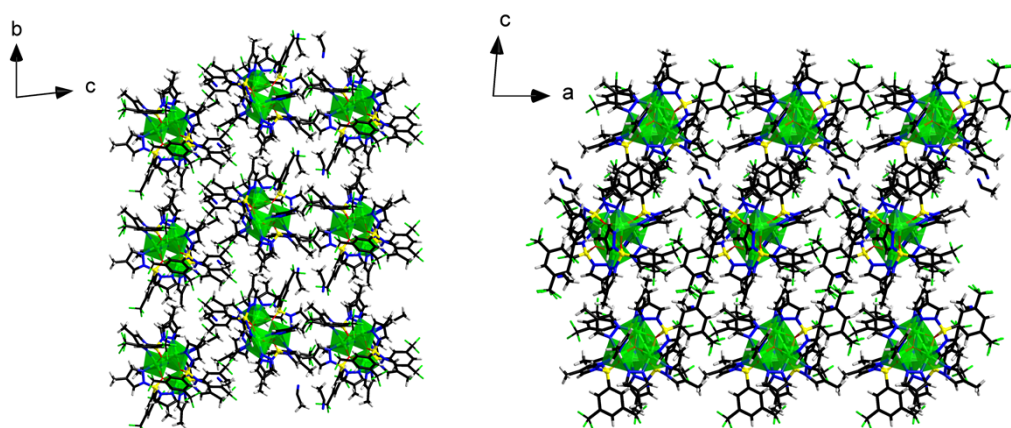

**Figure S6.** Packing diagrams of **AIOC-127** in the view of (a) a-axis and (b) c-axis.

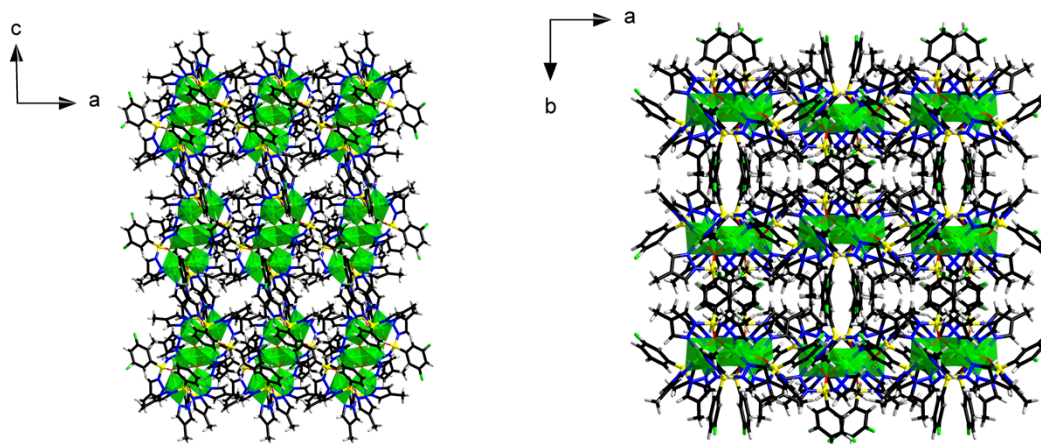

**Figure S7.** Packing diagrams of **AIOC-128** in the view of (b) a-axis and (c) c-axis.

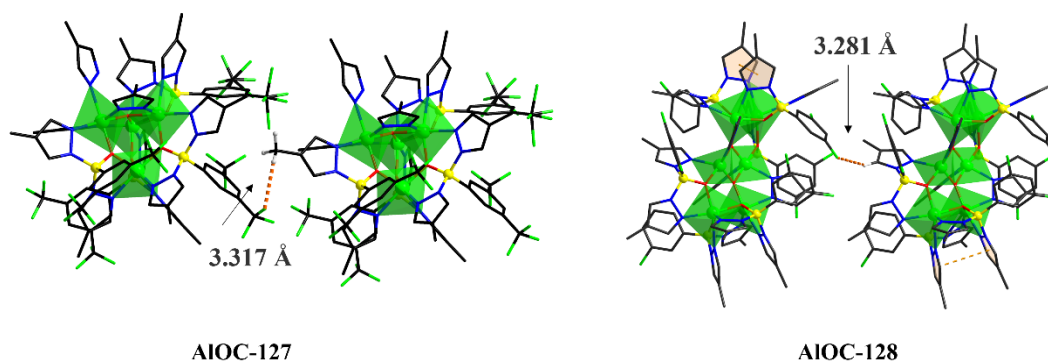

**Figure S8.** The hydrogen bond interactions (C-H...F) between F on benzene ring and C-H on 4-methylpyrazole in the **AIOC-127** and **AIOC-128**. Color code: Al, green; C, black; O, red; N, blue; B, yellow; F, green; H, white.

#### PXRD analyses for Al-O-B clusters

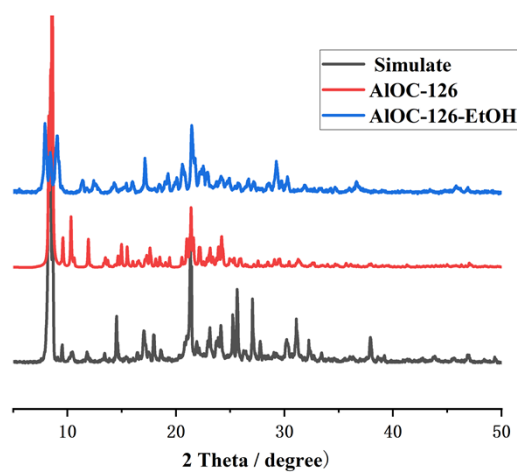

**Figure S9.** PXRD patterns of **AIOC-126**.

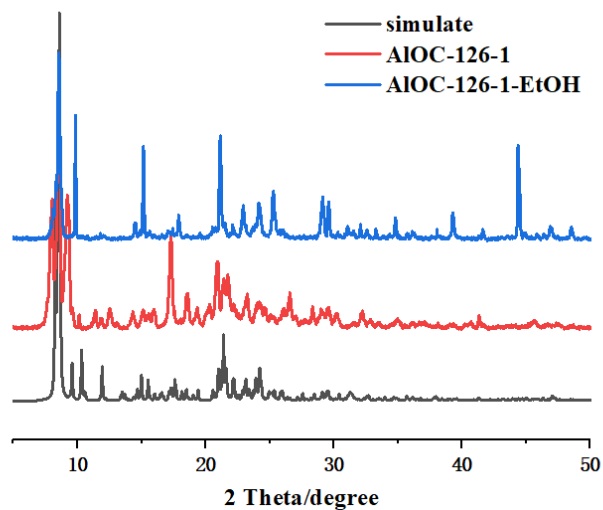

Figure S10. PXRD patterns of AIOC-126-1.

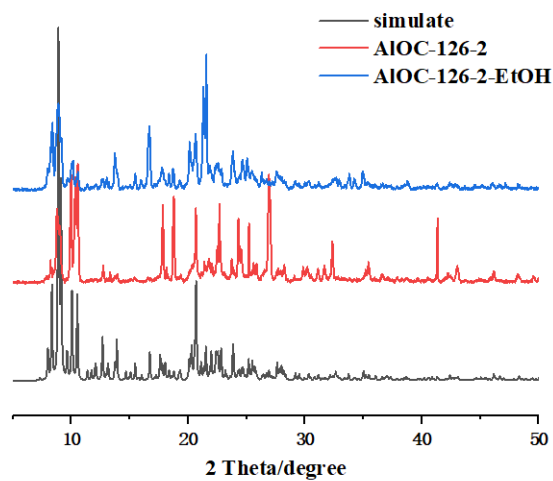

Figure S11. PXRD patterns of AIOC-126-2.

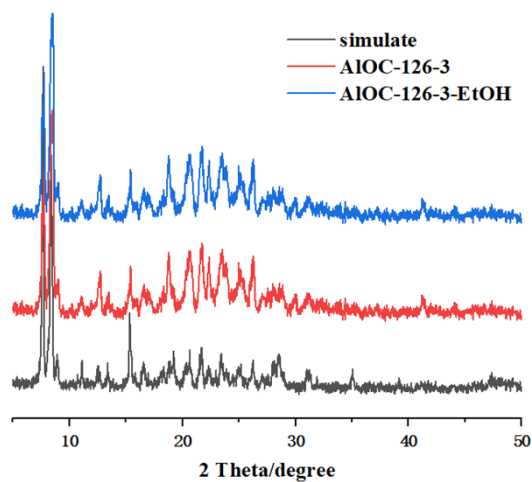

Figure S12. PXRD patterns of AIOC-126-3.



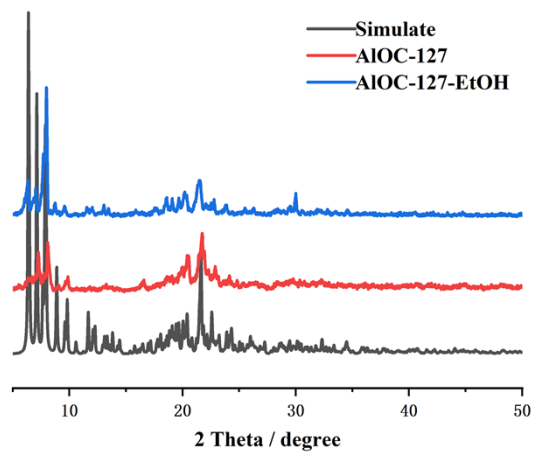

**Figure S13.** PXRD patterns of **AIOC-127**.

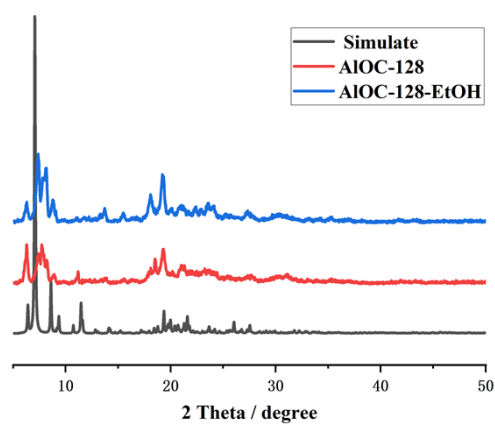

**Figure S14.** PXRD patterns of **AIOC-128**.

**FT-IR spectra of Al-O-B clusters**

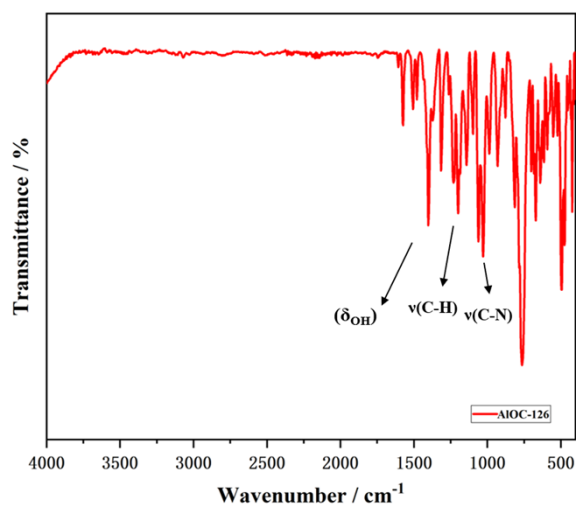

**Figure S15.** FT-IR spectra of **AIOC-126**.

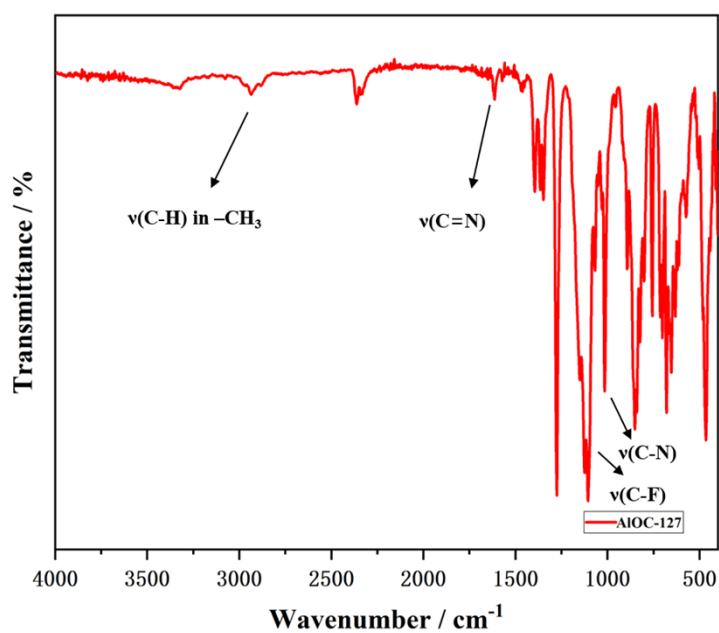

Figure S16. FT-IR spectra of AIOC-127.

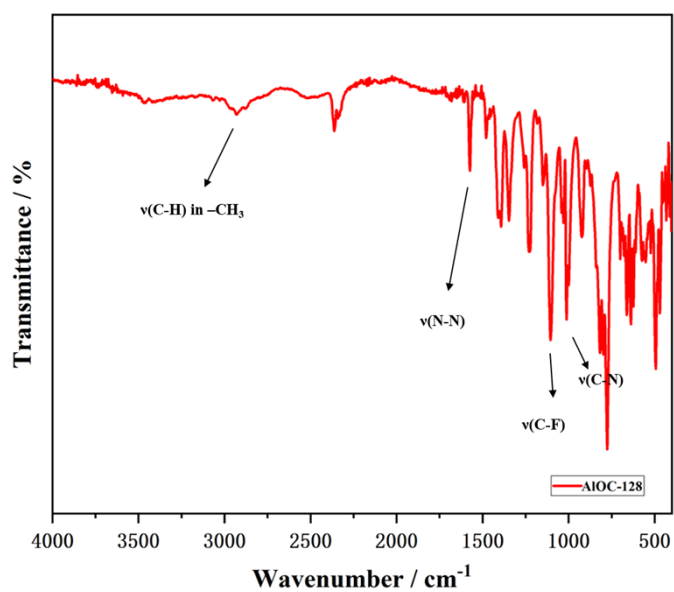

Figure S17. FT-IR spectra of AIOC-128.

It can be seen from the Fig. S15-S17 that AIOC-126 has an  $\delta_{\text{OH}}$  peak because of the incompletely protonated L exists in AIOC-126. Given that the introduction of functional groups F into the benzene ring and 4-methylpyrazole, AIOC-127 and AIOC-128 have  $\nu_{\text{(C-F)}}$  and  $\nu_{\text{(C-H)}}$  in -CH<sub>3</sub> peaks than AIOC-126.

## EDS spectra of Al-O-B clusters

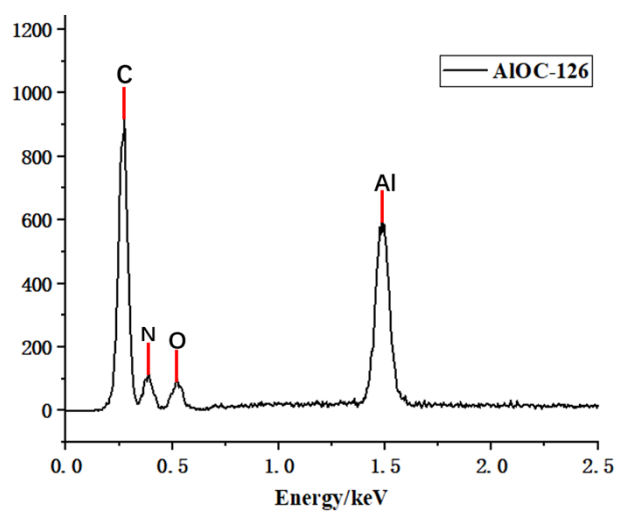

Figure S18. EDS spectra of AIOC-126.

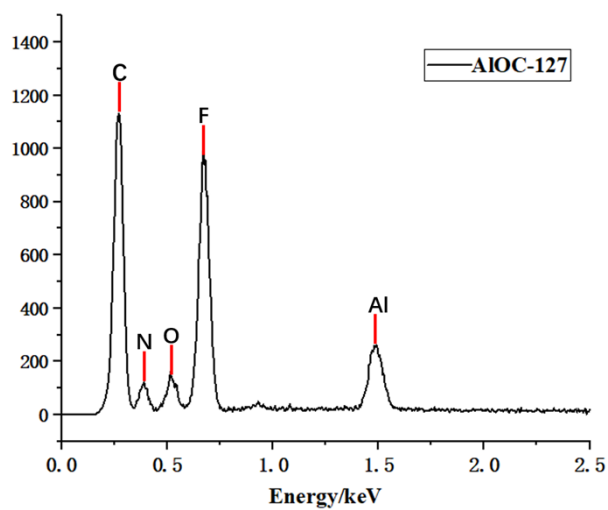

Figure S19. EDS spectra of AIOC-127.

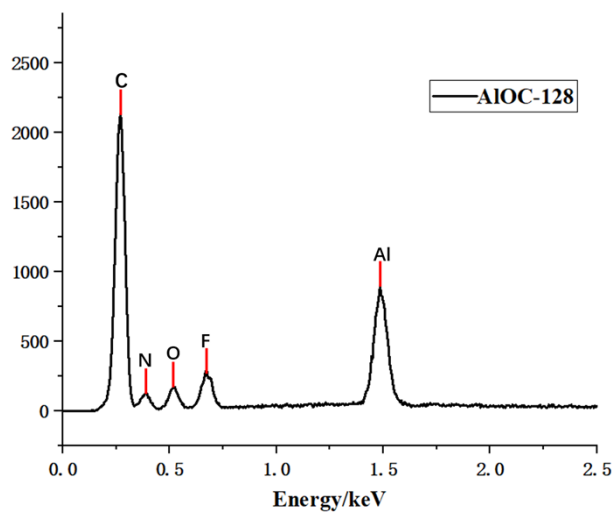

Figure S20. EDS spectra of AIOC-128.

The solid-state absorption spectra of Al-O-B clusters.

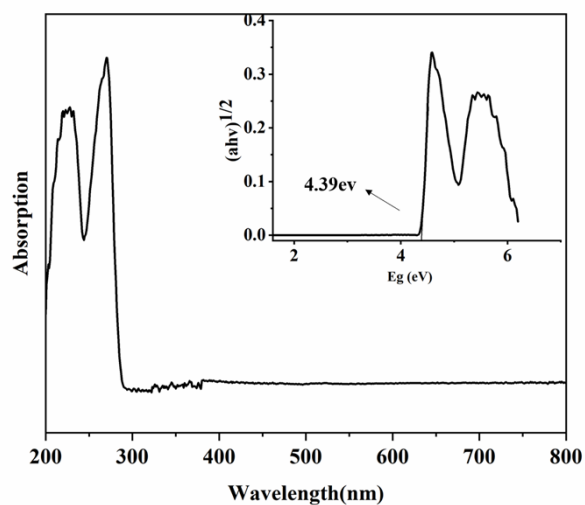

Figure S21. The solid-state absorption spectra of AIOC-126.

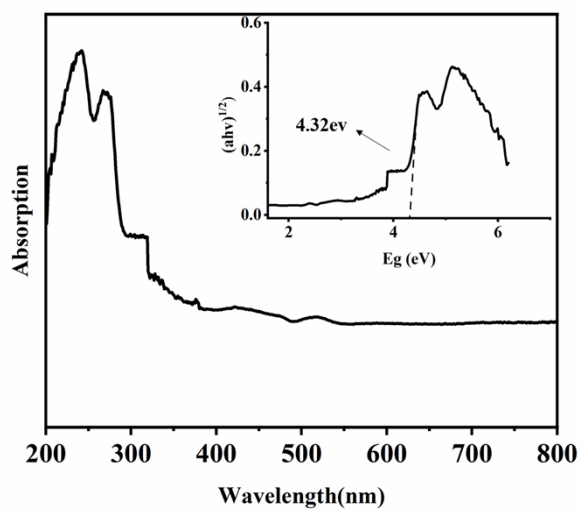

Figure S22. The solid-state absorption spectra of AIOC-127.

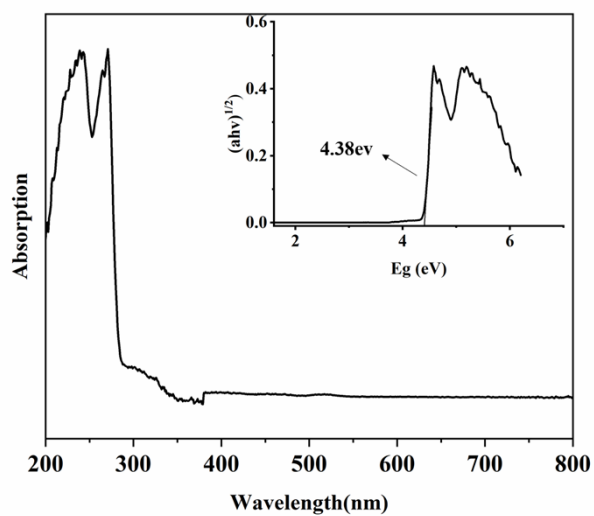

Figure S23. The solid-state absorption spectra of AIOC-128.

TGA spectra of Al-O-B clusters.

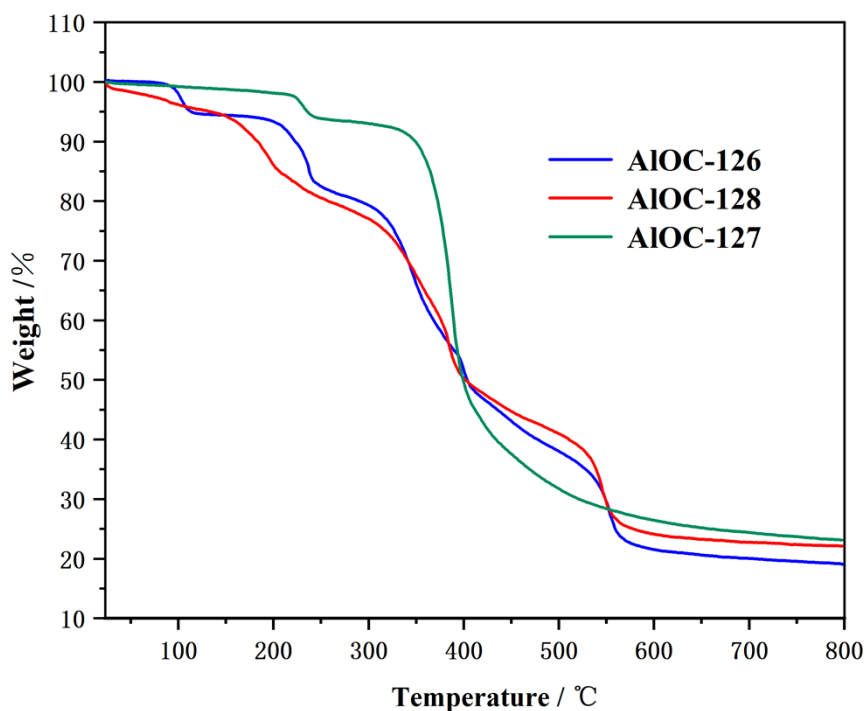

Figure S24. TGA spectra of AlOC-126, AlOC-127, AlOC-128.

The thermal stability of **AlOC-126** to **AlOC-128** was investigated in N<sub>2</sub> atmosphere up to 800 °C with a heating rate of 10 K min<sup>-1</sup>, which is presented in Fig. S24. There are similar structures and compositions in AlOC-126 to AlOC-128, so only the TG investigation of **AlOC-127** was described in detail. **AlOC-127** with tetranuclear configuration can be stabilized at 217 °C before weight loss begins. It reveals a weight loss (6.7%) between 217 °C and 340 °C can be attributed to the removal of CH<sub>3</sub>CN. The weight loss (64.5%) between 340 °C and 620 °C is assigned to the departure of the organic ligand owing to degradation of the structure.

Table S2. BVS analysis for **AlOC-126**.

|                   |                   |                   |                   |
|-------------------|-------------------|-------------------|-------------------|
| <b>AlO1 3.328</b> | <b>AlO2 3.334</b> | <b>O004 1.316</b> | <b>O0AA 1.312</b> |
| AlO1-O003 1.8607  | AlO2-O003 1.8698  | AlO1-O004 1.8846  | AlO2-O0AA 1.8903  |
| AlO1-O004 1.8846  | AlO2-O005 1.8468  | B01I- O004 1.461  | B01Q-O0AA 1.459   |
| AlO1-O005 1.8825  | AlO2-O0AA 1.8903  |                   |                   |
| AlO1-N007 1.9743  | AlO2-N00D 1.9699  |                   |                   |
| AlO1-N009 1.9762  | AlO2-N00E 2.0762  |                   |                   |
| AlO1-N00B 2.0570  | AlO2-N00L 1.9847  |                   |                   |

## Calculation of the nonlinear optical parameters

The following values are calculated and simulated according to the reported literature.<sup>2, 3</sup> The nonlinear absorption coefficient ( $\beta$ ) can be determined by fitting Equation (1) with the experimental data obtained from the OA Z-scan.  $I_0$ : the on-axis peak intensity at the focus ( $Z = 0$ ),  $L_{eff}$ : the effective thickness of the sample,  $\alpha$  is the linear absorption coefficient, and  $l$  is the sample thickness;  $n$  is the refractive index;  $c$ : the speed of light; the imaginary part of the third-order nonlinear optical susceptibility  $lm\chi^{(3)}$  was calculated from the relation that  $lm\chi^{(3)}$  is in proportion to  $\beta$ ; FOM could remove the discrepancy caused by the different linear absorption coefficient  $\alpha$ . The relationship between the sample transmission and input laser intensity for a spatially Gaussian beam can be plotted from the open-aperture Z-scan curve. From the input laser pulse energy  $E_{in}$  and beam radius  $\omega(z)$ , the light fluence  $F_{in}(z)$  at any position can be obtained.

$$T(Z, S = 1) = \frac{1}{\frac{1}{\pi^2(Z, 0)}} \int_{-\infty}^{\infty} \ln[1 + q_0(Z, 0)e^{-r^2}] dr \quad (1)$$

$$q_0(Z, 0) = \beta I_0 L_{eff} \quad (2)$$

$$L_{eff} = \frac{1 - e^{-\alpha l}}{\alpha} \quad (3)$$

$$\omega(Z) = \frac{\omega_0}{\left[1 + \left(\frac{Z}{Z_0}\right)^2\right]^{-0.5}} \quad (4)$$

$$lm\chi^{(3)}(esu) = \left(\frac{10^{-7} n^2 \lambda c}{96\pi^2}\right) \beta \quad (5)$$

$$F_{in}(z) = \frac{4E_{in}\sqrt{\ln 2}}{3 \pi^2 \omega(z)^2} \quad (6)$$

$$FOM = \left| \frac{lm\chi^{(3)}}{\alpha} \right| \quad (7)$$

Table S3. Linear transmittance (T%), linear absorption coefficient ( $\alpha$ ), nonlinear absorption coefficient ( $\beta$ ), imaginary part of third-order nonlinear susceptibility ( $\chi^{(3)}$ ), FOM, and T at 0.02 J/cm<sup>2</sup> of the AIOC-126, AIOC-127, AIOC-128.

| samples         | T (%) | A (cm <sup>-1</sup> ) | $\beta$ (cm/GW) | $\text{Im}\chi^{(3)}$ ( $\times 10^{-13}$ esu) | FOM  | T at 0.02 J/cm <sup>2</sup> (%) |
|-----------------|-------|-----------------------|-----------------|------------------------------------------------|------|---------------------------------|
| <b>AIOC-126</b> | 65    | 4.31                  | 0.41            | 1.60                                           | 1.93 | 72                              |
| <b>AIOC-127</b> | 65    | 4.31                  | 0.58            | 2.27                                           | 2.73 | 67                              |
| <b>AIOC-128</b> | 65    | 4.31                  | 0.87            | 3.40                                           | 4.09 | 52                              |

## References

1. C.-B. Yao, K.-X. Zhang and X. Wen, Focus introduction: Z-scan technique, *Optik*, 2017, **140**, 680-682.
2. Q.-F. Chen, X. Zhao, Q. Liu, J.-D. Jia, X.-T. Qiu, Y.-L. Song, D. J. Young, W.-H. Zhang and J.-P. Lang, Tungsten(VI)–Copper(I)–Sulfur Cluster-Supported Metal–Organic Frameworks Bridged by in Situ Click-Formed Tetrazolate Ligands, *Inorg. Chem.*, 2017, **56**, 5669-5679.
3. D.-J. Li, Q.-h. Li, Z.-R. Wang, Z.-Z. Ma, Z.-G. Gu and J. Zhang, Interpenetrated Metal-Porphyrinic Framework for Enhanced Nonlinear Optical Limiting, *J. Am. Chem. Soc.*, 2021, **143**, 17162-17169.
